# Supplementary material
Source: HighWire-hosted journal article supplement (https://erj.ersjournals.com/content/57/6/2100166)
Supplement: inline-supplementary-material-1 [file inline-supplementary-material-1.pdf]

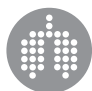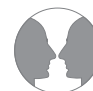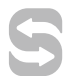

SHAREABLE PDF

# Real world effectiveness of anti-IL-5/5R therapies is independent of co-eligibility for anti-IgE therapy

Andrew P. Hearn<sup>1,2</sup>, Oliver D. Hug<sup>2</sup>, Ziana A. Somani<sup>2</sup>, Joanne Kavanagh<sup>1,2</sup>, Grainne d'Ancona<sup>1</sup>, Cris Roxas<sup>1</sup>, Linda Green<sup>1</sup>, Louise Thomson<sup>1</sup>, Mariana Fernandes<sup>1</sup>, Brian D. Kent<sup>1,3,4</sup>, Jaideep Dhariwal <sup>1</sup>, Alexandra M. Nanzer<sup>1</sup> and David J. Jackson <sup>1,2</sup>

**Affiliations:** <sup>1</sup>Guy's Severe Asthma Centre, Guy's Hospital, Guy's and St Thomas' NHS Trust, London, UK. <sup>2</sup>School of Immunology and Microbial Sciences, King's College London, London, UK. <sup>3</sup>Dept of Respiratory Medicine, St James' Hospital, Dublin, Ireland. <sup>4</sup>School of Medicine, Trinity College Dublin, Dublin, Ireland.

**Correspondence:** David J. Jackson, Guy's Severe Asthma Centre, Guy's and St Thomas' NHS Trust; School of Immunology and Microbial Sciences, King's College London, SE1 9RT, UK. E-mail: David.Jackson@gstt.nhs.uk

@ERSpublications

**In a real-world setting, the clinical response to the anti-IL-5/5R mAbs mepolizumab and benralizumab in patients with severe eosinophilic asthma is independent of co-eligibility with the anti-IgE mAb omalizumab** <https://bit.ly/2NfAitP>

**Cite this article as:** Hearn AP, Hug OD, Somani ZA, *et al.* Real world effectiveness of anti-IL-5/5R therapies is independent of co-eligibility for anti-IgE therapy. *Eur Respir J* 2021; 57: 2100166 [<https://doi.org/10.1183/13993003.00166-2021>].

This single-page version can be shared freely online.

## To the Editor:

Mepolizumab and benralizumab are monoclonal antibodies (mAbs) approved for the treatment of severe eosinophilic asthma (SEA), targeting interleukin (IL)-5 and IL-5R, respectively [1]. In appropriately selected patients, their use leads to significant reductions in asthma exacerbations and maintenance oral corticosteroid (mOCS) dose [2, 3].
